# Supplementary material for: Identification of the canonical and noncanonical role of miR-143/145 in estrogen-deficient bone loss
Source: PubMed Central journal article supplement (PMC8039936; doi:10.7150/thno.55041), 2021-03-13
Supplement: thnov11p5491s1.pdf [file thnov11p5491s1.pdf]

# Supplemental Information

## Supplemental Figures

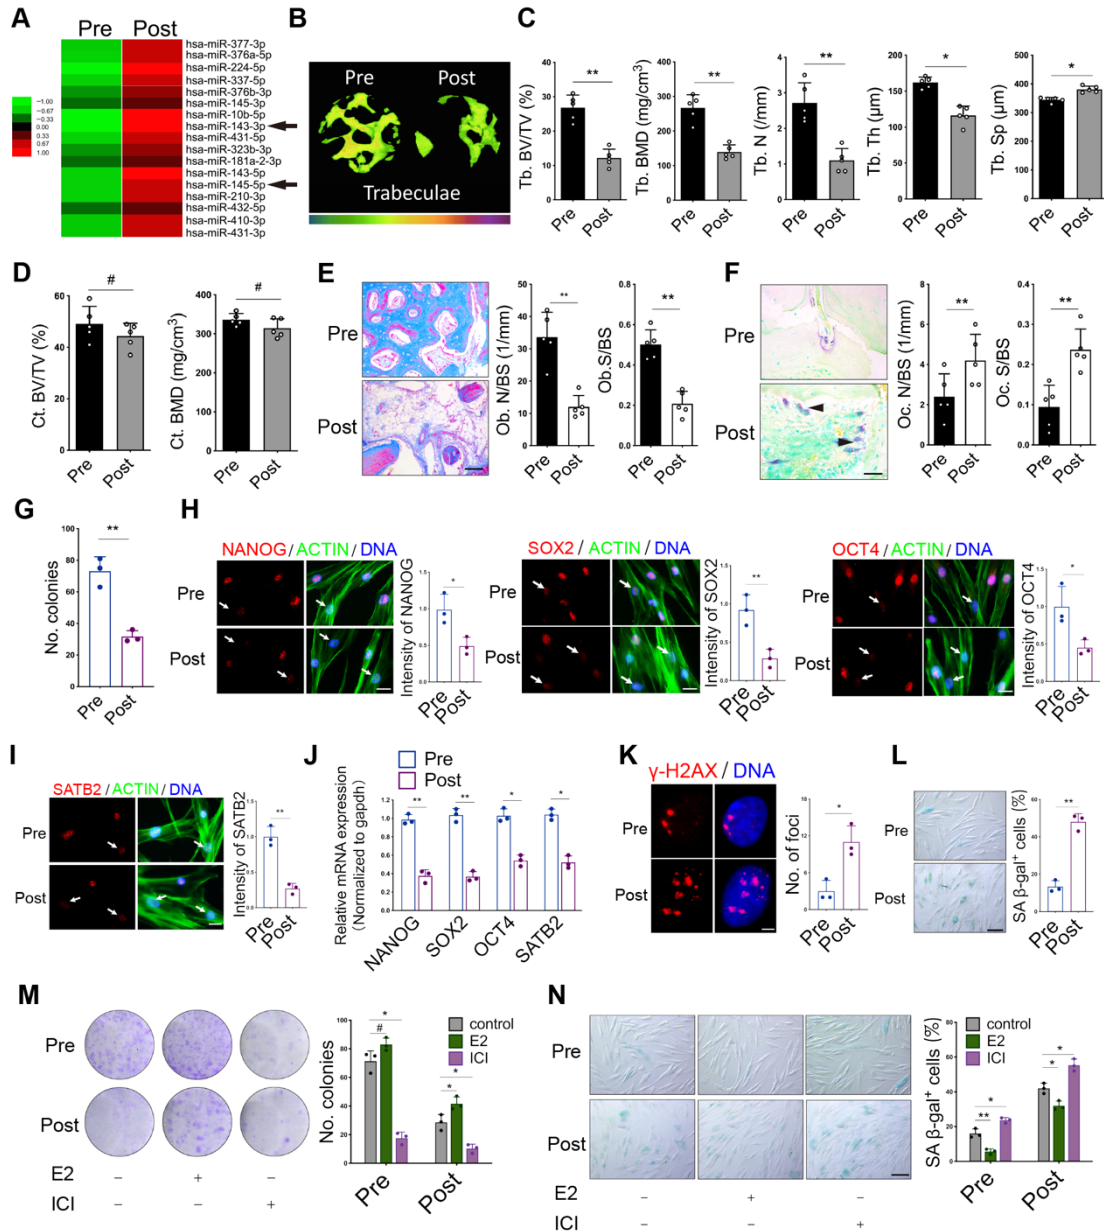

**Fig. 1. Increases in miR-143/145 levels during estrogen-deficient osteoporosis and the attenuation of BMSC function**

**A** Heatmap analysis of the miRNAs profiling in Pre- and Post-BMSCs. **B** The trabecular thickness in cancellous bone was color coded, which blue-green color indicates thinner trabeculae and yellow-red color indicates thicker trabeculae. **C** Quantitative measurements of Tb. BV/TV, Tb. BMD, Tb. N, Tb. Sp, and Tb. Th of trabeculae were calculated. **D** Cortical bone from dental implantation surgery was quantified for Ct. BV/TV and BMD analysis. **E** Representative masson trichrome

staining images and quantitative for Ob.N/BS and Ob.S/BS analysis were showed. Scale bars: 200  $\mu\text{m}$ . **F** Representative TRAP staining images and quantification of N.Oc/BS (osteoclast number / bone surface). Arrow head indicated the positive staining osteoclasts. Scale bars: 50  $\mu\text{m}$ . **G** The quantification of colonies was analyzed in Pre- and Post-BMSCs. **H, I** Immunostaining of NANOG, SOX2, OCT4 and SATB2 expression in BMSCs. White arrows indicated the BMSCs with decreased core TFs and the mean intensity was measured with ImageJ. Scale bars: 50  $\mu\text{m}$ . **J** qRT-PCR showing NANOG, SOX2, OCT4 and SATB2 mRNA expression in Pre- and Post-BMSCs. **K**  $\gamma\text{H2AX}$  foci and **(L)** SA- $\beta$ -gal staining was examined to indicate the senescence difference. Right panel showed the analysis of  $\gamma\text{H2AX}$  foci numbers and SA- $\beta$ -gal positive cells. Scale bars: 4  $\mu\text{m}$  (**K**); 100  $\mu\text{m}$  (**L**). **M** CFU assays showed that estrogen potentiated colony numbers and ICI reduced the colonies in Pre- or Post-BMSCs. **N** BMSCs stimulated with estrogen or ICI were analyzed for senescence state by SA- $\beta$ -gal staining. Scale bars: 100  $\mu\text{m}$ . Results are presented as the mean  $\pm$  S.D. \* $p < 0.05$ ; \*\* $p < 0.01$ ; # $p > 0.05$  by Student's t test and one-way ANOVA.

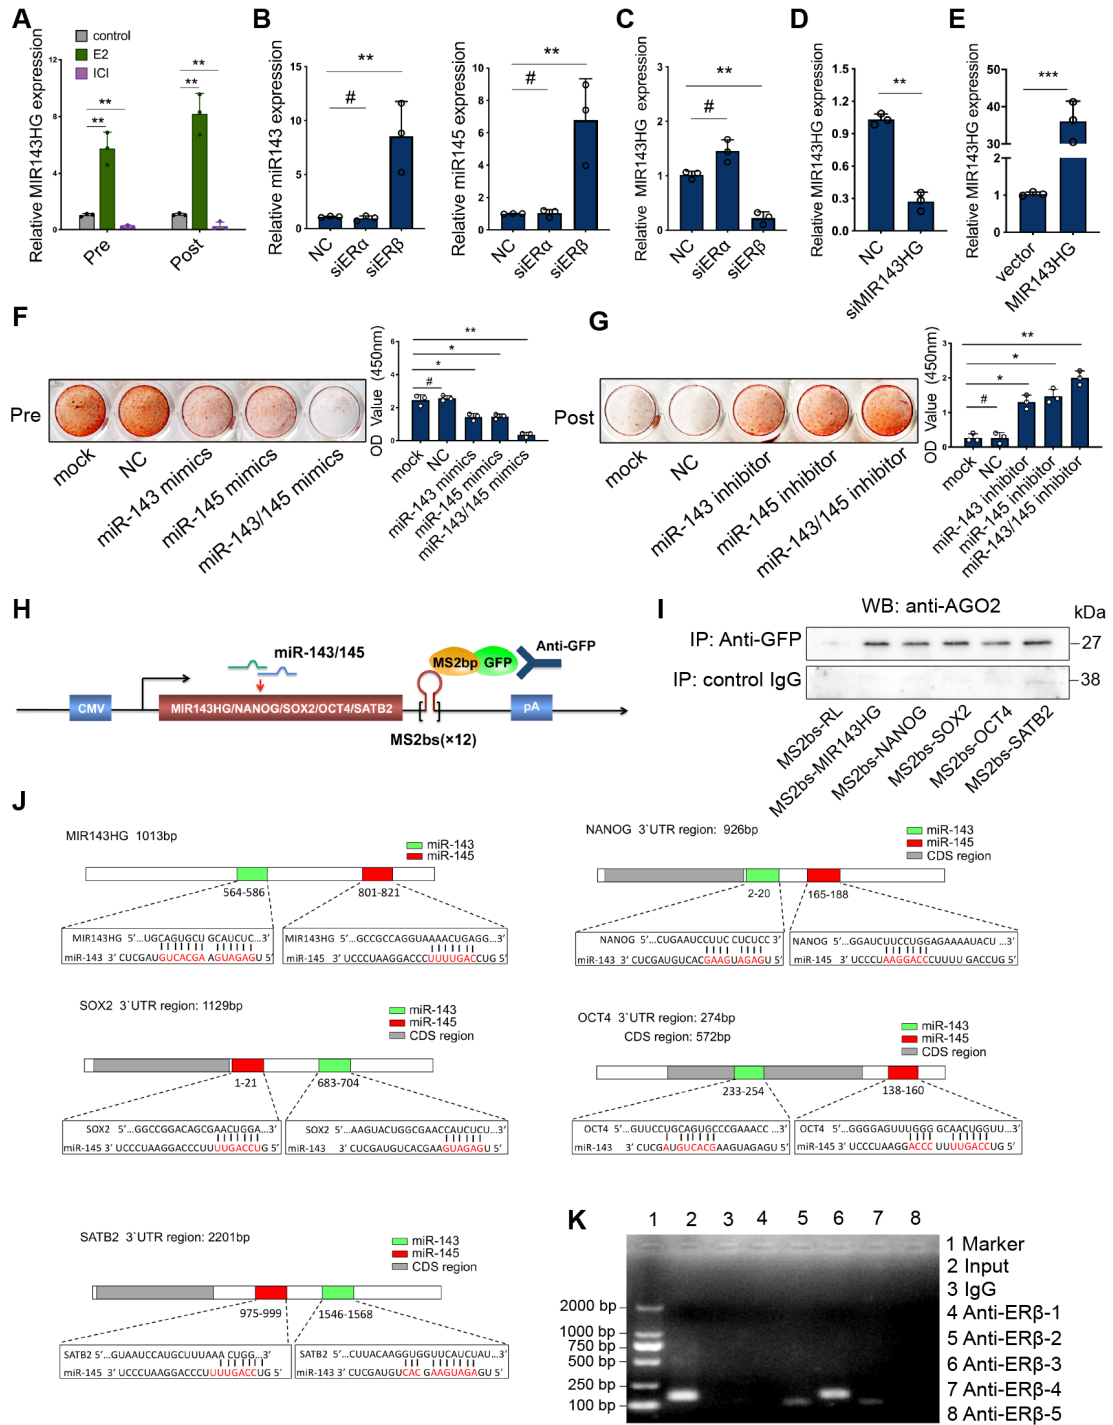

**Fig. 2. ER $\beta$  activates MIR143HG transcription to regulate the function of miR-143/145 that target core TFs and SATB2**

A MIR143HG was detected in estrogen or ICI treated BMSCs. **B, C** qRT-PCR showing the miR-143/145 and MIR143HG expression in siER $\alpha$  or siER $\beta$  transfected BMSCs. **D, E** Analysis for knockdown efficiency of MIR143HG siRNA (siMIR143HG) and enhancement efficiency of MIR143HG overexpressing plasmid. **F** Observation and quantitation of calcified nodules formation in Pre BMSCs that transfected with miR-

143/145 mimics by alizarin red staining. **G** Calcified nodules formation and quantitation in Post BMSCs. **H** MS2 system was applied for RIP assay, in which MS2bp specifically binding MS2bs. **I** After precipitated by GFP antibody or IgG, 10% volume of RNA-protein complexes were extracted and subjected to Western blot assay with AGO2 antibody. **J** The putative binding sites of miR-143/145 on MIR143HG, NANOG, SOX2, OCT4 and SATB2 transcripts were predicted by targetscan or Miranda. The red nucleotides indicated the putative paired sites. **K** The amplification products of DNA fragment from ChIP assay were then performed for gel shift assay. E2, estrogen. Results are presented as the mean  $\pm$  S.D. \* $p < 0.05$ ; \*\* $p < 0.01$ ; \*\*\* $p < 0.001$ ; # $p > 0.05$  by Student's t test and one-way ANOVA.

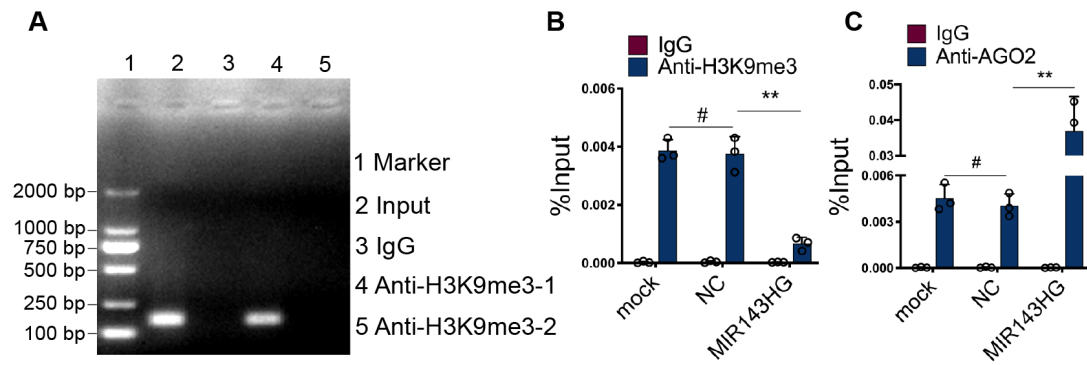

**Fig. 3. MIR143HG guides miR-143/145 into nuclear and cooperatively regulates SOX2 transcription**

**A** Amplified DNA using prime 1 or prime 2 were further examined by gel shift assay. **B, C** BMSCs transfected with mock, NC or MIR143HG overexpressing vector were subjected to ChIP assay by H3K9me3 or AGO2 antibody. Results are presented as the mean  $\pm$  S.D. \*\*  $p < 0.01$ ; #  $p > 0.05$  by Student's t test and one-way ANOVA.

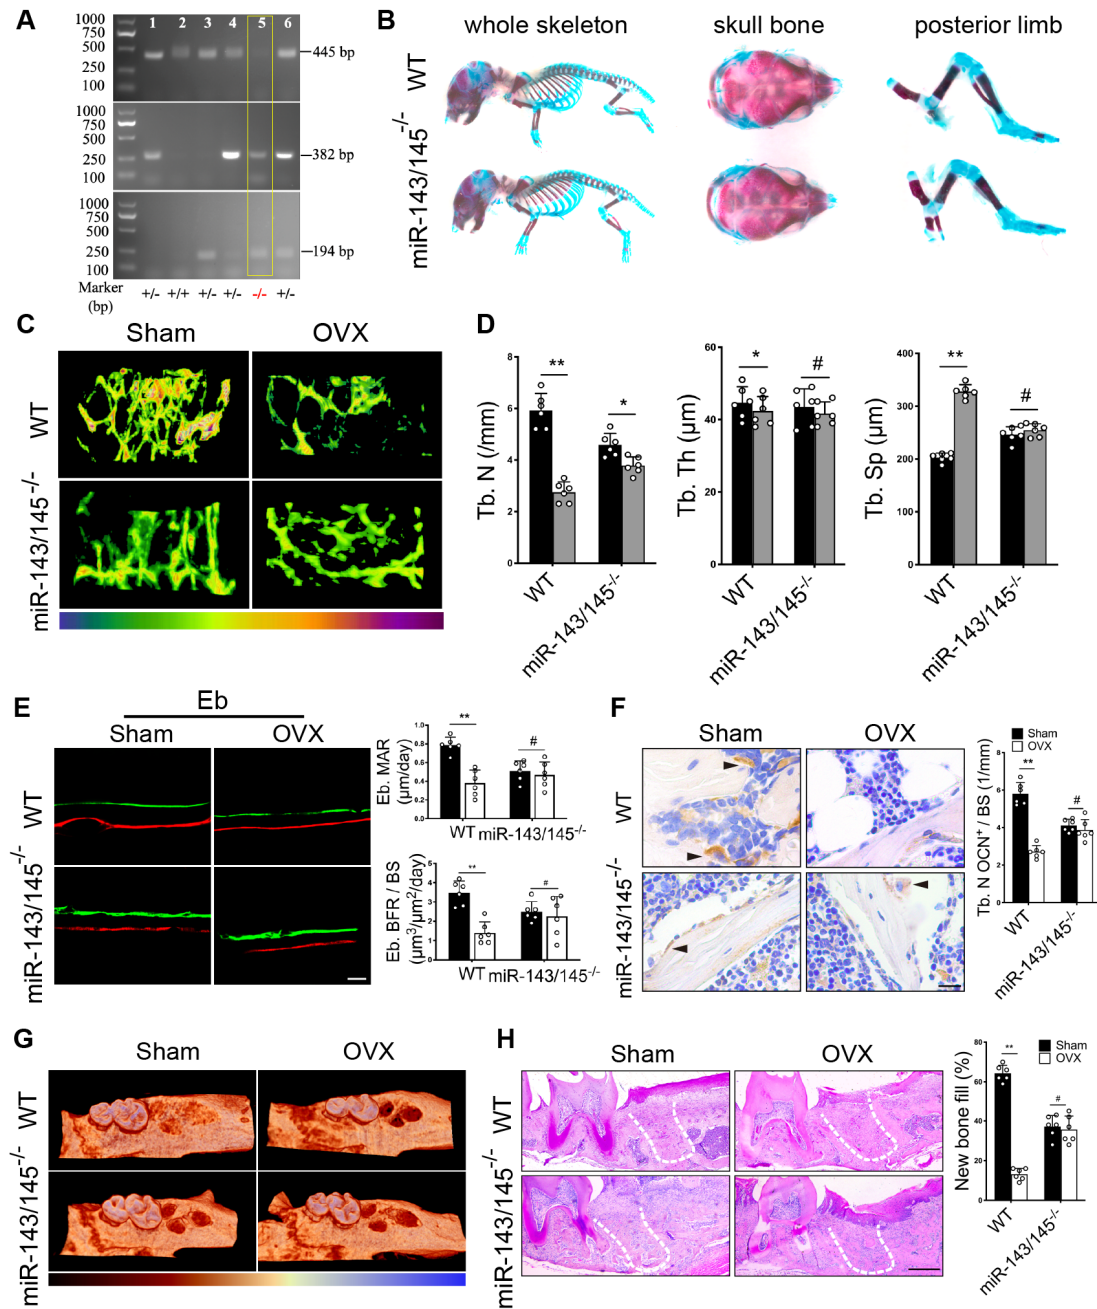

**Fig. 4. Depletion of miR-143/145 in mice prevented bone loss and potentiated bone regeneration in OVX-induced osteoporosis**

**A** All mice were genotyped by PCR from tail snip DNA. **B** Whole skeleton staining revealing the whole mount skeleton, skull bone, posterior limb using Alizarin red and Alcian blue. **C** Trabecular thickness maps were presented, which blue-green color indicates thinner trabeculae and yellow-red color indicates thicker trabeculae. **D** Quantitative measurements of Tb. N, Tb. Sp, Tb. Th. **E** Representative images of dynamic histomorphometry of endosteal (Eb) bone with quantification of mineralization apposition rate (MAR) and bone formation rate per bone surface (BFR/BS). Scale bars: 20  $\mu\text{m}$ . **F** Representative OCN positive osteoblasts and

quantification on the trabecular by IHC. Scale bars: 50  $\mu\text{m}$ . **G** Micro-CT analysis of new bone fill in tooth extraction socket by color coded thickness maps. Color changes from red to blue denote a gradual elevation in bone thickness. **H** Representative HE staining showing the new bone mass and quantification of new bone fill in tooth extraction socket, which was delineated by white dotted lines. Scale bars: 100  $\mu\text{m}$ . Results are presented as the mean  $\pm$  S.D. \* $p < 0.05$ ; \*\* $p < 0.01$ ; \*\*\* $p < 0.001$ ; # $p > 0.05$  by two-way ANOVA,  $n = 6$  mice per group.

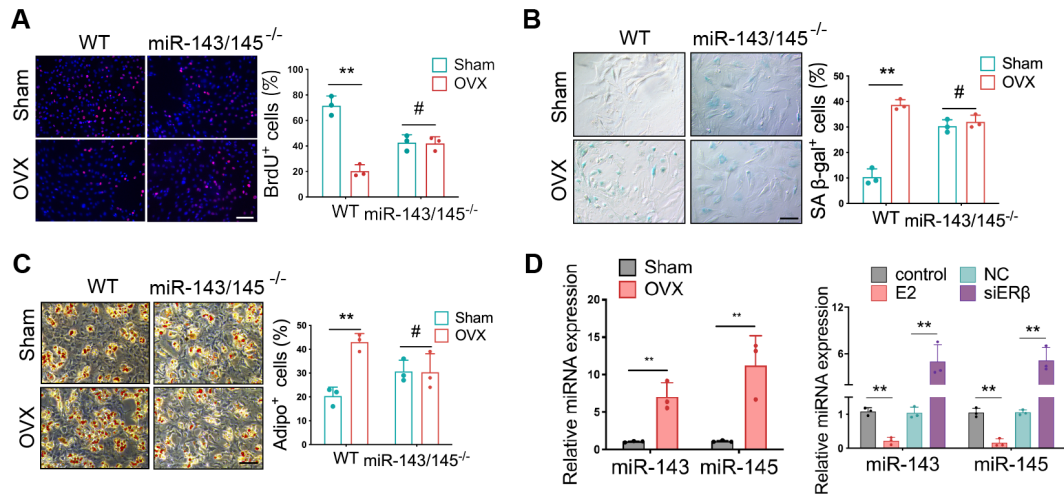

**Fig. 5. miR-143/145 depletion counteracts the adverse effects of estrogen deficiency on BMSCs function**

**A** BrdU assay revealing proliferation ability in Sham and OVX-induced WT and *miR-143/145*<sup>-/-</sup> BMSCs. Scale bars: 100 μm. **B** SA-β-gal showing the senescence difference in WT and *miR-143/145*<sup>-/-</sup> BMSCs following OVX. Right panel shows the respective quantification. Scale bars: 100 μm. **C** Oil red O staining showing the ability of adipogenic differentiation. Right panel shows the respective quantification. Scale bars: 100 μm. **D** Detection of miR-143/145 in OVX BMSCs and estrogen or siERβ treated BMSCs. Results are presented as the mean ± S.D. \**p* < 0.05; \*\**p* < 0.01 by Student's *t* test and one-way ANOVA.



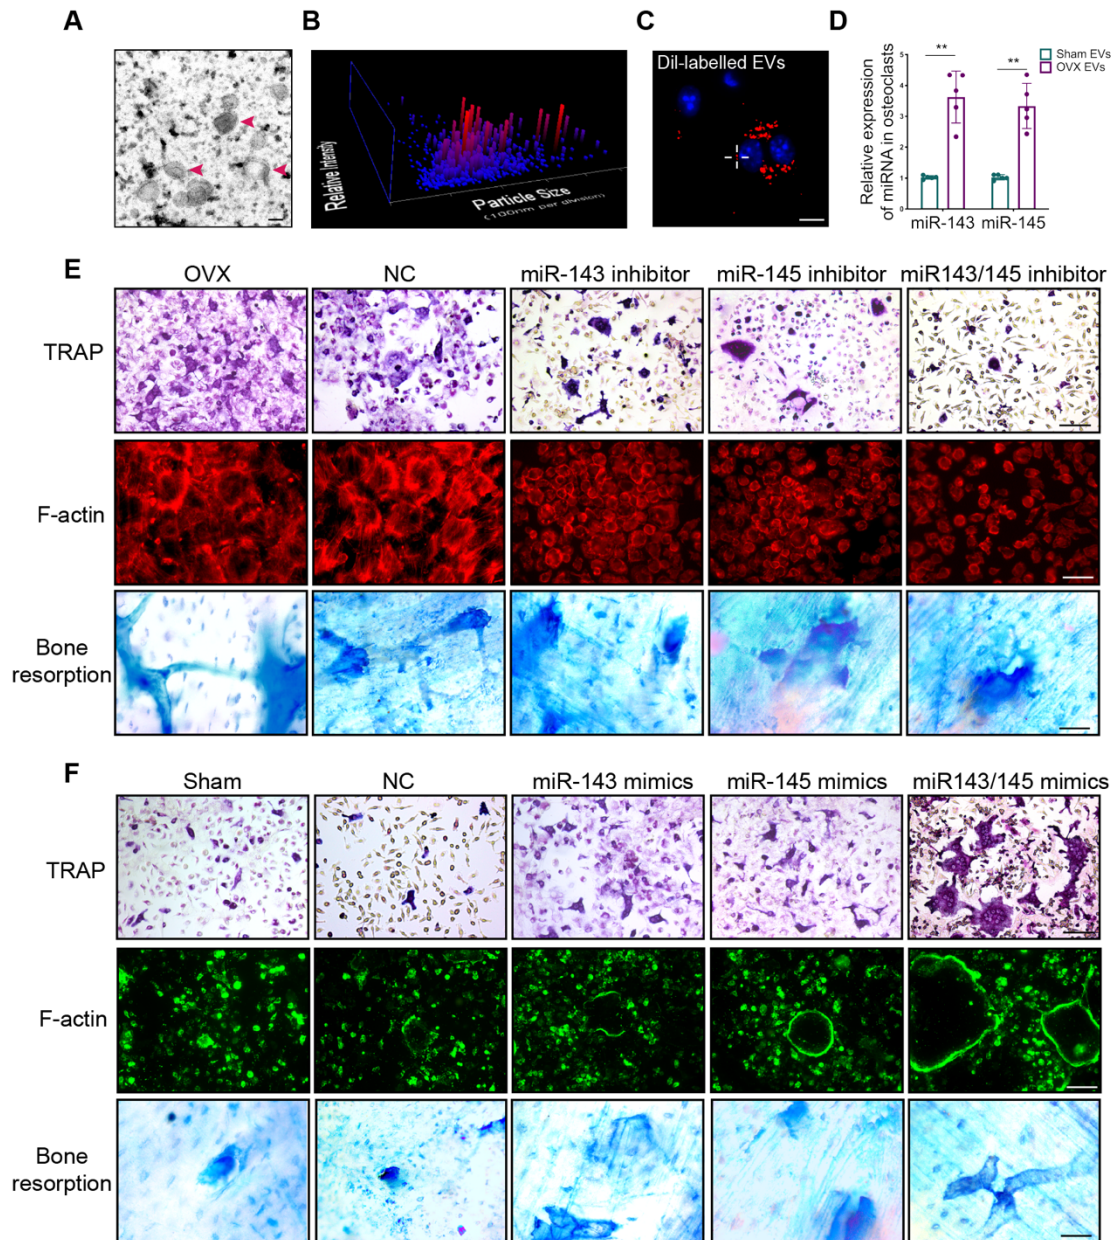

**Fig. 6. EVs loaded miR-143/145 from BMSCs activates osteoclast function**

**A** An overview TEM image of EVs that indicated by red arrows were captured to understand the whole EVs population. Scale bars: 100 nm. **B** The 3D graph (particle size vs. Relative intensity vs. particle number concentration) of NTA for calculating EVs size distribution. **C** Fluorescent microscopy analysis revealing the DiI-labeled EVs incorporated into osteoclasts. Scale bars: 50  $\mu$ m (**C**). **D** Osteoclasts co-cultured with EVs from Sham or OVX-induced BMSCs were examined by qRT-PCR. **E, F** Representative images of TRAP positive staining, F-actin ring staining, and bone resorption area in miR-143/145 inhibitor or mimics treated osteoclasts. Scale bars: 100  $\mu$ m (**E, F**). Results are presented as the mean  $\pm$  S.D. \* $p$  < 0.05; \*\* $p$  < 0.01 by Student's t test.

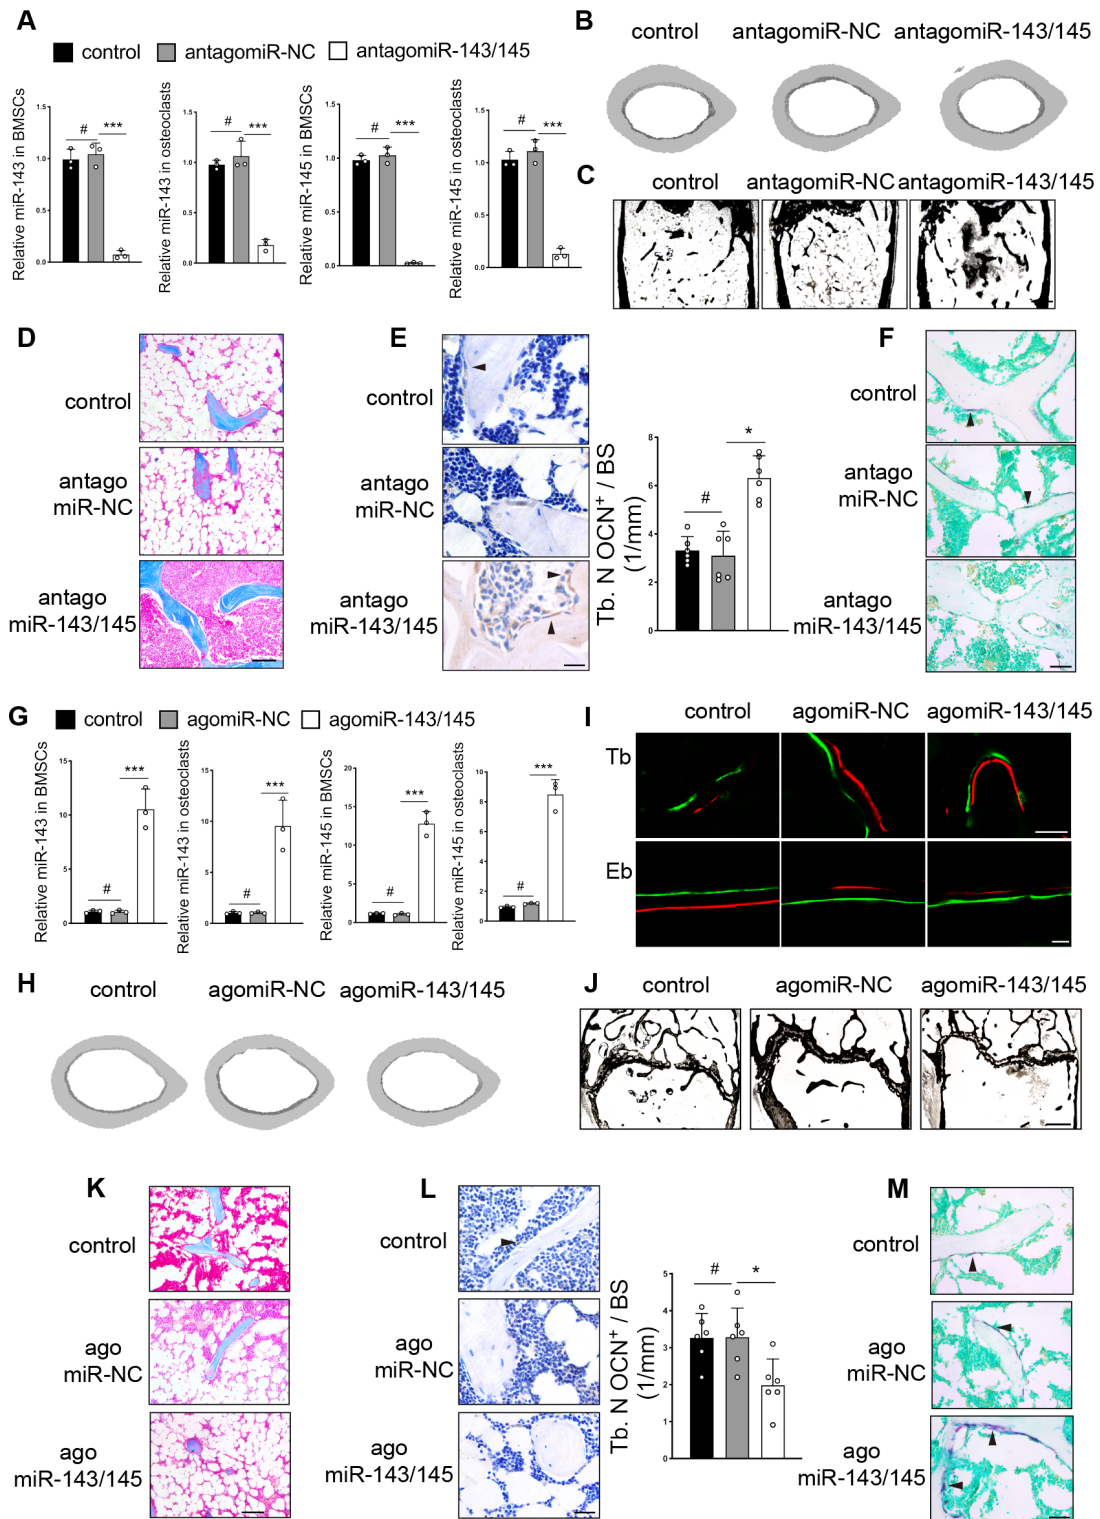

**Fig. 7. AntagomiR-143/145 prevents and agomiR-143/145 exacerbates OVX-induced bone loss**

A qRT-PCR analysis of miR-143/145 expression in BMSCs and osteoclasts of mice with antagomiR. B Representative micro-CT images of cortical bone from control, antagomiR-NC, and antagomiR-143/145 treated femurs. C Von Kossa staining showing

an overall trabecular bone mass. Scale bars: 500  $\mu\text{m}$ . **D** Masson trichrome staining revealing the trabecular bone accounts. Scale bars: 100  $\mu\text{m}$ . **E** IHC showing the OCN positive osteoblasts. Arrow head indicated the positive staining osteoblasts. Scale bars: 50  $\mu\text{m}$ . **F** TRAP staining showing osteoclastic activity. Arrow head indicated the positive staining osteoclasts. Scale bars: 50  $\mu\text{m}$ . **G** qRT-PCR analysis of miR-143/145 expression in BMSCs and osteoclasts with agomiR. **H** Micro-CT images of cortical bone from control, agomiR-NC, and agomiR-143/145 treated mice. **I** Representative images of dynamic histomorphometry of Tb and Eb bone. Scale bars: 20  $\mu\text{m}$ . **J** Representative images of von Kossa showing an overall trabecular bone mass. Scale bars: 500  $\mu\text{m}$ . **K** Representative images of masson trichrome staining revealing the trabecular bone mass and quantification of osteoblast numbers and surface on the trabecular, (**L**) as well as OCN positive osteoblasts by IHC. Scale bars: 100  $\mu\text{m}$  (**K**); 50  $\mu\text{m}$  (**L**). Arrow head indicated the positive staining osteoblasts. **M** Representative images of TRAP staining showing osteoclastic activity. Arrow head indicated the positive staining osteoclasts. Scale bars: 50  $\mu\text{m}$ . Results are presented as the mean  $\pm$  S.D. \* $p < 0.05$ ; # $p > 0.05$ , by one-way ANOVA, n = 6 mice per group.

**Supplemental Table**

**Table S1. Primer sequence for qRT-PCR and ChIP qPCR.**

| Gene                                                    | Primer Sequence                    |
|---------------------------------------------------------|------------------------------------|
| Primer for human GAPDH                                  | F 5'-GGAGATTACTGCCCTGGCTCCTA-3'    |
|                                                         | R 5'-GACTCATCGTACTCCTGCTTGCTG-3'   |
| Primer for human NANOG                                  | F 5'-AAGGTCCCGGTCAAGAAACAG-3'      |
|                                                         | R 5'-CTTCTGCGTCACACCATTGC-3'       |
| Primer for human SOX2                                   | F 5'-GGCAGAGAAGAGAGTGTTTGC-3'      |
|                                                         | R 5'-GCCGCCGATGATTGTTATT-3'        |
| Primer for human OCT4                                   | F 5'-TGAGAGGCAACCTGGAGAAT-3'       |
|                                                         | R 5'-AACCACACTCGGACCACATC-3'       |
| Primer for human SATB2                                  | F 5'-CCAGGAGTTTGGGAGATGGTAT-3'     |
|                                                         | R 5'-GTGAGGAGACTGTTCGTTGGTT-3'     |
| Primer for human MIR143HG                               | F 5'-AGAGCCGCCAGGTAAAAC-3'         |
|                                                         | R 5'-TCCAACCCACCAAAGG-3'           |
| Primer for mouse pri-miR-143                            | F5'-GTCTCCAGGGCGTGTCCAGACCAGTA-    |
|                                                         | R 5' CCTGAGCTACAGTGCTTCATCTCAGA-3' |
| Primer for mouse pri-miR-145                            | F 5'-GTCCAGTTTTCCAGGAATCCCTT-3'    |
|                                                         | R 5' GTCCCAAGACCGCTTACCTCCCTC-3'   |
| Primer for human MIR143HG Promotor-1 (ChIP-ER $\beta$ ) | F 5'-TGAGTCATAGCTTACATC-3'         |
|                                                         | R 5'-GGAACTAACTTCTGTGAA-3'         |
|                                                         | F 5'-CCACTCAGGATGTCACAAG-3'        |

|                                                          |                              |
|----------------------------------------------------------|------------------------------|
| Primer for human MIR143HG Promotor-2 (ChIP-ER $\beta$ )  | R 5'-CTCATTACAGTTCCTCAGA-3'  |
| Primer for human MIR143HG Promotor-3 (ChIP-ER $\beta$ )  | F 5'-CTCTGGGAAGAAGGCATTT-3'  |
|                                                          | R 5'-GGGTTTGAATGTGGAATGTC-3' |
| Primer for human MIR143HG Promotor-4 (ChIP-ER $\beta$ )  | F 5'-CCTGAAGGACATTCCACAT-3'  |
|                                                          | R 5'-GAAGCTACTCCCATCATCAT-3' |
| Primer for human MIR143HG Promotor-5 (ChIP-ER $\beta$ )  | F 5'-TCTCAGGCTTAATGACTTC-3'  |
|                                                          | R 5'-AAGGAGTGGTTGACAATT-3'   |
| Primer for human SOX2 Promotor-1 (ChIP-RNAa complex)     | F 5'-AAGGTTAGTAAGGAACAA-3'   |
|                                                          | R 5'-TTCTTCTGTAACACTCTC-3'   |
| Primer for human SOX2 Promotor-2 (ChIP-RNAa complex)     | F 5'-TGTAGCGACAACAAGAGAA-3'  |
|                                                          | R 5'-GTTAGAGGAGGATGAGATGG-3' |
| Primer for mouse miR-143/145 Promotor (ChIP-ER $\beta$ ) | F 5'-AGGGACCCCAAATCATAA-3'   |
|                                                          | R 5'-AACCTACCTCATCCTCTG-3'   |

**Table S2. Information of Antibodies, Chemicals Reagent, Commercial Kit, Cell Lines, mouse Strains, Recombinant DNA and Software in this study.**

| <b>REAGENT or RESOURCE</b>                             | <b>SOURCE</b>             | <b>Cat#</b>      |
|--------------------------------------------------------|---------------------------|------------------|
| <b>Antibodies (Dilution)</b>                           |                           |                  |
| Rabbit polyclonal anti-NANOG (1:500)                   | Santa Cruz                | Cat# sc-33760    |
| Rabbit monoclonal anti-SOX2 (1:1000)                   | Abcam                     | Cat# ab93689     |
| Rabbit monoclonal anti-OCT4 (1:1000)                   | Abcam                     | Cat# ab181557    |
| Rabbit polyclonal anti-SATB2 (1:1000)                  | Abcam                     | Cat# ab69995     |
| Mouse monoclonal anti-BrdU (1:500)                     | Proteintech               | Cat# MS-396-P1   |
| Mouse monoclonal anti- $\gamma$ H2AX (1:1000)          | Abcam                     | Cat# ab26350     |
| Rabbit polyclonal anti-P53 (1:800)                     | Proteintech               | Cat# 10442-1-AP  |
| Rabbit polyclonal anti-P21 (1:500)                     | Proteintech               | Cat# 10355-1-AP  |
| Rabbit polyclonal anti-GFP (1:1000)                    | Abcam                     | Cat# ab290       |
| Rabbit monoclonal anti-AGO2 (1:1000)                   | Cell Signaling Technology | Cat# 2897        |
| Rabbit polyclonal anti-H3K9me3 (1:1000)                | Abcam                     | Cat# ab8898      |
| Mouse monoclonal anti-LMNA (1:1000)                    | Cell Signaling Technology | Cat# 86846       |
| Rabbit polyclonal anti- RUNX2 (1:1000)                 | Cell Signaling Technology | Cat# AP12556PU-N |
| Rabbit polyclonal anti-OCN (1:1000)                    | Abcam                     | Cat# ab93876     |
| Rabbit polyclonal anti-CD226 (1:500)                   | Affinity Bioscience       | Cat# AF0087      |
| Rabbit Polyclonal anti-SRGAP2 (1:500)                  | Proteintech               | Cat# 22519-1-AP  |
| Mouse monoclonal anti-CD63 (1:1000)                    | Abcam                     | Cat# ab213090    |
| Rabbit monoclonal anti-CD9 (1:1000)                    | Abcam                     | Cat# ab92726     |
| Rabbit Polyclonal anti-Estrogen Receptor beta (1:1000) | Abcam                     | Cat# ab3577      |

| <b>Chemicals, Peptides, and Recombinant Proteins</b> |                          |                |
|------------------------------------------------------|--------------------------|----------------|
| DMEM, low glucose                                    | Thermo Fisher Scientific | Cat# 11885084  |
| MEM Alpha basic                                      | Thermo Fisher Scientific | Cat# 12571063  |
| Fetal Bovine Serum                                   | Thermo Fisher Scientific | Cat# 16140071  |
| Penicillin-Streptomycin                              | Sigma-Aldrich            | Cat# V900929   |
| Red Blood Cell Lysis Buffer                          | Beyotime                 | Cat# C3702     |
| Estrogen                                             | Sigma-Aldrich            | Cat# 1250008   |
| Estrogen Receptor Antagonist, ICI 182,780            | Sigma-Aldrich            | Cat# 5. 31042  |
| L-Ascorbic acid                                      | Sigma-Aldrich            | Cat# A5960     |
| $\beta$ -Glycerophosphate                            | Sigma-Aldrich            | Cat# E2758     |
| dexamethasone                                        | Sigma-Aldrich            | Cat# D4902     |
| Insulins                                             | Sigma-Aldrich            | Cat# I0908     |
| 3-isobutyl-1-methylxanthine                          | Sigma-Aldrich            | Cat# I5879     |
| Indomethacin                                         | Sigma-Aldrich            | Cat# I7378     |
| Oil Red O                                            | Sigma-Aldrich            | Cat# O0625     |
| Anti-Murine M-CSF                                    | PeptoTech                | Cat# 500-P62G  |
| Recombinant Murine sRANK Ligand                      | PeptoTech                | Cat# 315-11    |
| Lipofectamine™ 2000 Transfection Reagent             | Invitrogen               | Cat# 11668027  |
| TRIzol™ LS Reagent                                   | Invitrogen               | Cat# 10296010  |
| Calcein                                              | Sigma-Aldrich            | Cat# C0875     |
| Alizarin Red S                                       | Sigma-Aldrich            | Cat# A5533     |
| DiIC18(3) ( Ex/Em:550/567nm)                         | YEASEN                   | Cat# 40726ES10 |

| <b>Critical Commercial Assays</b>                                    |                                         |                    |
|----------------------------------------------------------------------|-----------------------------------------|--------------------|
| miRNeasy Serum/Plasma kit                                            | QIAGEN                                  | Cat# 217184        |
| TRAP staining kit                                                    | Sigma-Aldrich                           | Cat# N2250         |
| $\beta$ -Gal Staining Kit                                            | GenMed                                  | Cat#<br>GMS10012.1 |
| All-in-One miRNA qRT-PCR Detection Kit                               | GeneCopoeia                             | Cat# QP004         |
| EZ-Magna RIP™ RNA-Binding Protein Immunoprecipitation Kit            | Millipore                               | Cat# 17-701        |
| Hyperactive in-Situ ChIP kit                                         | Vazyme                                  | Cat# TD901-01      |
| Fluorescent in situ hybridization kit                                | Genepharma                              | Cat# F03201        |
| Dual-Luciferase Reporter Assay System                                | Promega                                 | Cat# E1960         |
| <b>Experimental Models: Cell Lines</b>                               |                                         |                    |
| Human: alveolar bone marrow-derived mesenchymal stem cells           | This paper                              | N/A                |
| Mouse: bone marrow-derived mesenchymal stem cells                    | This paper                              | N/A                |
| Human: 293T cells                                                    | ATCC                                    | CM-1009            |
| <b>Experimental Models: Organisms/Strains</b>                        |                                         |                    |
| Mouse: miR-143/145 <sup>-/-</sup> (B6/N-miR-143/145 <sup>tm1</sup> ) | Model Animal Research Center of Nanjing | T000090            |
| <b>Oligonucleotides</b>                                              |                                         |                    |
| GMR-miRTM microRNA single-stranded mimics                            | Genepharma                              | B01001             |
| GMR-miRTM microRNA inhibitors                                        | Genepharma                              | B03001             |
| miR-UPTM agomir                                                      | Genepharma                              | B06002             |
| miR-Down™ antagomir                                                  | Genepharma                              | B05002             |
| Chemically modified siRNA                                            | Genepharma                              | A02004             |
| <b>Recombinant DNA</b>                                               |                                         |                    |



|                                                   |                    |                                                                           |
|---------------------------------------------------|--------------------|---------------------------------------------------------------------------|
| Plasmid: pEX-3<br>(pGCMV/MCS/Neo) vector          | Genepharma         | N/A                                                                       |
| Plasmid: pcDNA3-MS2 system<br>vector              | GeneCopoeia        | N/A                                                                       |
| Plasmid: pGL3-basic luciferase<br>reporter vector | GeneCopoeia        | N/A                                                                       |
| <b>Software and Algorithms</b>                    |                    |                                                                           |
| ImageJ                                            | Softonic           | <a href="https://imagej.nih.gov/ij/">https://imagej.nih.gov/ij/</a>       |
| LAS V4.12                                         | Leica Microsystems | <a href="https://www.leica-microsystems.com/">https://www.leica-</a>      |
| GraphPad Prism 8                                  | GraphPad           | <a href="https://www.graphpad.com/">https://www.graphpad.com/</a>         |
| Micro-CT NRecon v1.6 and CTAn<br>v1.13.8.1        | Skyscan            | <a href="https://www.skyscan.pt/">https://www.skyscan.pt/</a>             |
| Image-Pro Plus 7                                  | Media Cybernetics  | <a href="http://www.mediacy.com/image">http://www.mediacy.com/image</a>   |
| Adobe Illustrator                                 | Adobe              | <a href="https://www.adobe.com/cn/prod">https://www.adobe.com/cn/prod</a> |
